# Supplementary material for: Hypoglycemic effect of a novel polysaccharide fromLentinus edodeson STZ-induced diabetic miceviametabolomics study and Nrf2/HO-1 pathway
Source: Royal Society of Chemistry journal article supplement (doi:10.1039/d1fo03487a), 2022-01-01
Supplement: d1fo03487a1.pdf [file d1fo03487a1.pdf]

## Supplementary materials

Table S1 UPLC conditions

| time (min) | 95% deionized water<br>+5% acetonitrile +0.1%<br>formic acid (%) | Acetonitrile +0.1%<br>formic acid (%) | Sample<br>volume<br>( $\mu$ L) | The<br>velocity (mL<br>/min) |
|------------|------------------------------------------------------------------|---------------------------------------|--------------------------------|------------------------------|
| 0          | 100                                                              | 0                                     | 5                              | 0.2                          |
| 2          | 100                                                              | 0                                     | 5                              | 0.2                          |
| 3          | 90                                                               | 10                                    | 5                              | 0.2                          |
| 5          | 60                                                               | 40                                    | 5                              | 0.2                          |
| 10         | 10                                                               | 90                                    | 5                              | 0.2                          |
| 24         | 1                                                                | 99                                    | 5                              | 0.2                          |
| 27         | 1                                                                | 99                                    | 5                              | 0.2                          |
| 28         | 100                                                              | 0                                     | 5                              | 0.2                          |
| 30         | 100                                                              | 0                                     | 5                              | 0.2                          |

Table S2 MS conditions

| Ion source                 | Desolvent<br>gas flow<br>rate | Desolvent<br>temperature | Cone-hole<br>gas flow | Ion source<br>temperature | Capillary<br>voltage           | Taper hole<br>voltage |
|----------------------------|-------------------------------|--------------------------|-----------------------|---------------------------|--------------------------------|-----------------------|
| Temperature<br>and voltage | 40L/h                         | 300°C                    | 53 L/h                | 120°C                     | 4000V (+<br>)<br>2800V (-<br>) | 35V                   |

Table S3 Primer synthesis sequences

| The name of the primer | Primer sequences 5'—3' | TM   |
|------------------------|------------------------|------|
| Nrf-2-F                | TTGTAGATGACCATGAGTCGC  | 22   |
| Nrf-2-R                | CCTGCTGCTTGTTTTCCGTA   | 22   |
| HO-1-F                 | GTAAAGCGTCTCCACGAGGT   | 22   |
| HO-1-R                 | AACTTGGTGGGGTTGTCGAT   | 23   |
| GAPDH-F                | CAGGAGGCATTGCTGATGAT   | 58.3 |
| GAPDH-R                | GAAGGCTGGGGCTCATTT     | 55.7 |
